# Supplementary material
Source: PubMed Central journal article supplement (PMC7482591)
Supplement: mmc1.pdf [file mmc1.pdf]

## SUPPLEMENTARY INFORMATION: Description of the Lab Developed Test

**Table 1: Summary of LDT Extraction Methods**

|                                | <b>LDT-1</b>                   | <b>LDT-2D</b>         | <b>LDT-2R</b>       | <b>LDT-FUS</b>                                 |
|--------------------------------|--------------------------------|-----------------------|---------------------|------------------------------------------------|
| Extraction Reagents            | MagMAX (Thermo Scientific)     | DNA Mini Kit (QIAGEN) | RNeasy Kit (QIAGEN) | Panther Fusion reagents (Hologic)              |
| Extraction Instrument          | KingFisher (Thermo Scientific) | QIACube (QIAGEN)      | QIACube (QIAGEN)    | Panther Fusion (Hologic)                       |
| Specimen Volume for Extraction | 200 µL                         | 140 µL                | 200 µL              | 500 µL loaded (≈150 µL extracted) <sup>†</sup> |
| Elution Volume from Extraction | 110 µL                         | 50 µL                 | 50 µL               | 50 µL                                          |

<sup>†</sup> 500 µL of specimen is mixed with 710 µL of Hologic Lysis Buffer and loaded on to the Panther Fusion instrument.

The on-board extraction process uses 360 µL of this mixture, of which ≈150 µL is derived from the specimen.

**Table 2: Summary of LDT RT-PCR Methods**

|                          | <b>LDT-1</b>                                     | <b>LDT-2</b>                                     | <b>LDT-FUS</b>                                                                                                      |
|--------------------------|--------------------------------------------------|--------------------------------------------------|---------------------------------------------------------------------------------------------------------------------|
| RT-PCR System            | CFX96 (BioRad)                                   | Rotor Gene Q (QIAGEN)                            | Panther Fusion (Hologic)                                                                                            |
| Template (Eluate) Volume | 5 uL                                             | 5 uL                                             | 5 uL                                                                                                                |
| Master Mix Buffer        | Taqman Fast 1-Step Virus Mix (Thermo Scientific) | Taqman Fast 1-Step Virus Mix (Thermo Scientific) | PPR Mix supplemented with 3 mM MgCl <sub>2</sub> and 100 mM KCl plus Open Access RNA/DNA Enzyme Cartridge (Hologic) |

**Table 3: Primer and Probe Sequences:**

| Screening Test<br>Oligonucleotide Name | Oligonucleotide Sequence                  | Concentration (nM) |       |         |
|----------------------------------------|-------------------------------------------|--------------------|-------|---------|
|                                        |                                           | LDT-1              | LDT-2 | LDT-FUS |
| E Forward                              | 5'-ACAGGTACGTTAATAGTTAATAGCGT-3'          | 400                | 400   | 400     |
| E Reverse                              | 5'-ATATTGCAGCAGTACGCACACA-3'              | 400                | 400   | 400     |
| E Probe                                | 5'-FAM-ACACTAGCCATCCTTACTGCGCTTCG-BHQ1-3' | 200                | 200   | 200     |
| RNaseP Forward                         | 5'-AGATTTGGACCTGCGAGC-3'                  | 100                | 100   | 100     |
| RNaseP Reverse                         | 5'-GAGCGGCTGTCTCCACAAGT-3'                | 100                | 100   | 100     |
| RNaseP Probe                           | 5'-HEX-TTCTGACCTGAAGGCTCTGCGCG-BHQ1-3'    | 100                | 100   | 100     |

| Confirmatory Test<br>Oligonucleotide Name | Oligonucleotide Sequence                | Concentration (nM) |       |         |
|-------------------------------------------|-----------------------------------------|--------------------|-------|---------|
|                                           |                                         | LDT-1              | LDT-2 | LDT-FUS |
| N1 Forward                                | 5'-GACCCCAAATCAGCGAAAT-3'               | 400                | 400   | 400     |
| N1 Reverse                                | 5'-TCTGGTTACTGCCAGTTGAATCTG-3'          | 400                | 400   | 400     |
| N1 Probe                                  | 5'-FAM-ACCCCGCATTACGTTTGGTGGACC-BHQ1-3' | 200                | 200   | 200     |

‡ Oligonucleotide sequences are derived from the previously published Corman et al. (E gene) and US CDC (N1 gene) RT-PCR protocols.
